# Supplementary material for: Glomerular Galactose-Deficient IgA1(KM55) Positive May Predict Poorer Prognosis in Coexisting Primary Membranous Nephropathy and IgA Nephropathy Patients
Source: MDPI journal article supplement (doi:10.3390/cells12010116), 2022-12-28
Supplement: s1 [file s1]

**Supplementary Table 1 The main baseline clinicopathological features of patients regularly followed-up and Lost follow-up patients**

| Characteristics                       | Group A<br>(patients followed-up)<br>(n=40) | Group B<br>(patients lost follow-up)<br>(n=45) | P<br>value |
|---------------------------------------|---------------------------------------------|------------------------------------------------|------------|
| male n(%)                             | 26(65.0)                                    | 32(71.1)                                       | 0.546      |
| age(year)                             | 48.1±13.4                                   | 44.6±15.7                                      | 0.281      |
| microscopic hematuria n(%)            | 20(50.0)                                    | 24(53.3)                                       | 0.759      |
| proteinuria(g/24h)                    | 5.2(3.2,9.3)                                | 4.7(2.6,8.3)                                   | 0.359      |
| serum albumin (g/L)                   | 27.9(22.4,34.1)                             | 27.3(22.3,33.1)                                | 0.819      |
| nephrotic syndrome n(%)               | 26(65.0)                                    | 28(62.2)                                       | 0.791      |
| serum creatinine(μmol/L)              | 71.3(54.5,81.6)                             | 66.0(55.6,86.0)                                | 0.996      |
| eGFR-EPI(ml/min/1.73 m <sup>2</sup> ) | 104.5(92.1,114.8)                           | 100.8(90.6,119.0)                              | 0.944      |
| uric acid(μmol/L)                     | 372.0±81.3                                  | 385.0±90.5                                     | 0.498      |
| serum IgA(g/L)                        | 2.8(1.9,3.5)                                | 2.3(1.7,3.4)                                   | 0.220      |
| serum IgG(g/L)                        | 6.6(4.5,10.3)                               | 6.8(5.0,9.0)                                   | 0.795      |
| serum anti-PLA2R(RU/ml)               | 8.5(0.0,76.3)                               | 8.2(0.0,35.5)                                  | 0.431      |
| positive rates of anti-PLA2R<br>n(%)  | 17(42.5)                                    | 20(44.4)                                       | 0.857      |
| glomerular PLA2R positive<br>n(%)     | 30(75.0)                                    | 35(77.8)                                       | 0.763      |
| interstitial fibrosis,%, n(%)         |                                             |                                                | 1.000      |
| <25                                   | 34(85.0)                                    | 39(86.7)                                       |            |
| 25-50                                 | 5(12.5)                                     | 5(11.1)                                        |            |
| 50-75                                 | 1(2.5)                                      | 1(2.2)                                         |            |
| >75                                   | 0(0)                                        | 0(0)                                           |            |

eGFR, estimated glomerular filtration rate; PLA2R, M-type Phospholipase A2 Receptor

**Supplementary Table 2 The main baseline clinicopathological features in PMN/IgAN patients regularly followed-up based on the staining of glomerular KM55**

| Characteristics                       | KM55+<br>(patients followed-up)<br>(n=14) | KM55-<br>(patients followed-up)<br>(n=26) | P<br>value |
|---------------------------------------|-------------------------------------------|-------------------------------------------|------------|
| male n(%)                             | 8(57.1)                                   | 18(69.2)                                  | 0.501      |
| age(year)                             | 48.5±12.4                                 | 47.9±14.2                                 | 0.892      |
| proteinuria(g/24h)                    | 4.4±2.5                                   | 7.8±5.8                                   | 0.013      |
| serum albumin (g/L)                   | 29.3±7.4                                  | 28.1±7.9                                  | 0.635      |
| nephrotic syndrome n(%)               | 9(64.3)                                   | 17(65.4)                                  | 1.000      |
| serum creatinine(μmol/L)              | 77.2(56.0,83.5)                           | 69.6(54.3,78.4)                           | 0.234      |
| eGFR-EPI(ml/min/1.73 m <sup>2</sup> ) | 99.9(77.1,110.5)                          | 105.8(89.7,116.3)                         | 0.223      |
| serum anti-PLA2R(RU/ml)               | 38.9(1.6,137.5)                           | 4.6(0.0,48.6)                             | 0.202      |
| positive rates of anti-PLA2R<br>n(%)  | 7(50.0)                                   | 10(38.5)                                  | 0.481      |

|                                   |          |          |       |
|-----------------------------------|----------|----------|-------|
| glomerular PLA2R positive<br>n(%) | 11(78.6) | 19(73.1) | 1.000 |
| interstitial fibrosis,%, n(%)     |          |          | 0.083 |
| <25                               | 13(92.9) | 21(80.8) |       |
| 25-50                             | 0(0)     | 5(19.2)  |       |
| 50-75                             | 1(7.1)   | 0(0)     |       |
| >75                               | 0(0)     | 0(0)     |       |

eGFR, estimated glomerular filtration rate; PLA2R, M-type Phospholipase A2 Receptor
